# Supplementary material for: Conjugated microporous polymer foams with excellent thermal insulation performance in a humid environment
Source: PubMed Central journal article supplement (PMC8697720; doi:10.1039/d1ra01616d), 2021-04-14
Supplement: RA-011-D1RA01616D-s001.pdf [file RA-011-D1RA01616D-s001.pdf]

## Supporting Information

### Conjugated microporous polymer foams with excellent thermal insulation performance in humid environment

#### Experiment materials

1,1,2,2-tetrakis(4-bromophenyl) ethene (Kylpharm Co. Ltd), 1,3,6,8-tetrabromo-pyrene (Kylpharm Co. Ltd), 1,4-diethynylbenzene (Kylpharm Co. Ltd), 1,3,5-triethynyl-benzene (Kylpharm Co. Ltd), copper(I) iodide, tetrakis (triphenylphosphine) palladium, toluene, triethylamine.

#### Characterization

The structure of CMP foams was characterized by Solid-state  $^{13}\text{C}$ -CP/MAS NMR spectroscopy and Fourier Transform Infrared Spectroscopy (FTIR). Nitrogen isotherms were measured at 77K by Autosorb-iQ automatic specific surface and pore size distribution analyzer, Quanta-chrome. Powder X-ray diffraction (PXRD) was investigated on a D-MAX X-ray diffractometer (Rigaku, Japan). Scanning electron microscopy (SEM) images were operated on Apreo S instrument, (FEI American). Transmission electron microscopy (TEM) images were performed on TECNAI G<sup>2</sup> TF20 at an accelerating voltage of 200 kV, (FEI American). The powder was dispersed in EtOH solution and a drop mixture was dropped onto the copper network. TGA curves were obtained under argon protection by STA 449 F5 (NETZSCH), and the temperature was elevated from 50°C to 800°C with a heating rate of 10°C min<sup>-1</sup>. DSA100 was used in measuring the water contact angle, (KRUSS, Germany).

#### Test of thermal conductivity

Multifunction-rapid thermal conductivity tester (DRE-III, Xiang-yi) was used in measurement of CMP foams under different humidity conditions(50%/70%). Reference standard is ISO22007-2.

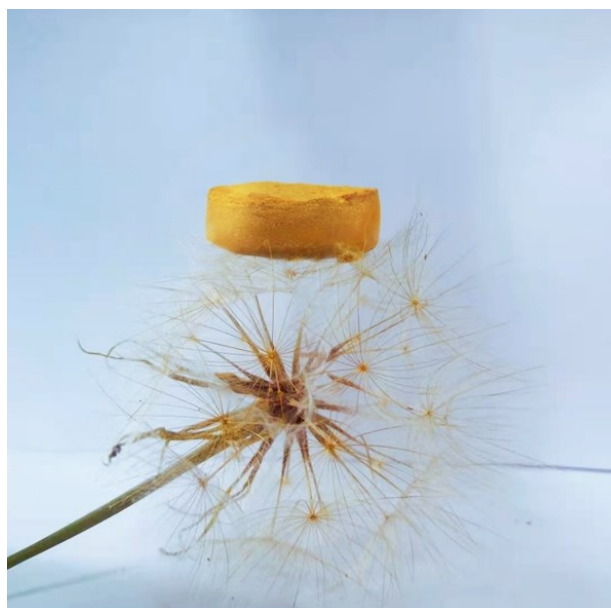

**Figure S1** The image of CMP-PT foam

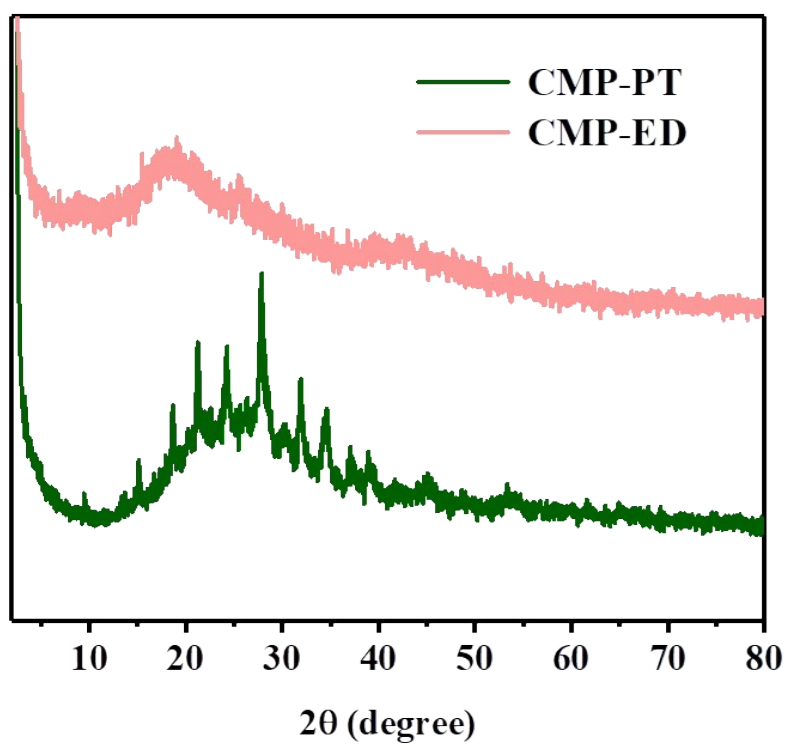

**Figure S2** Powder X-ray diffraction patterns of CMP-ED and CMP-PT

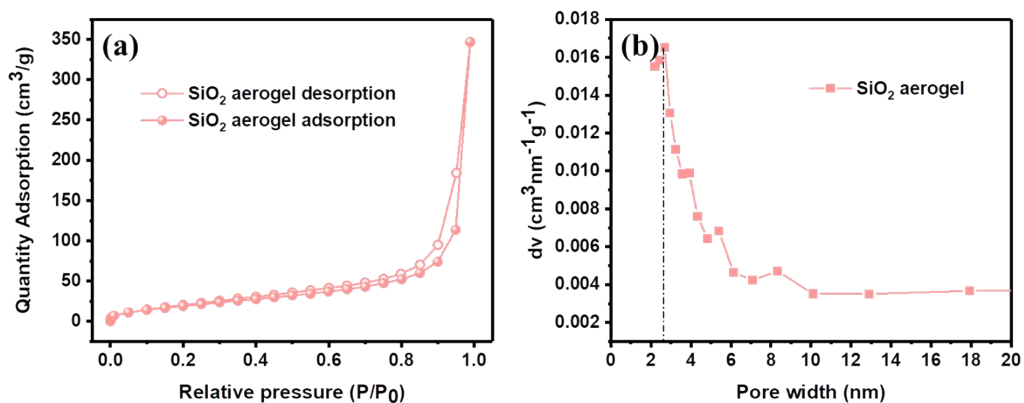

**Figure S3** Nitrogen adsorption and desorption isotherms (a), and distribution of pore size (b) of  $\text{SiO}_2$  aerogel.

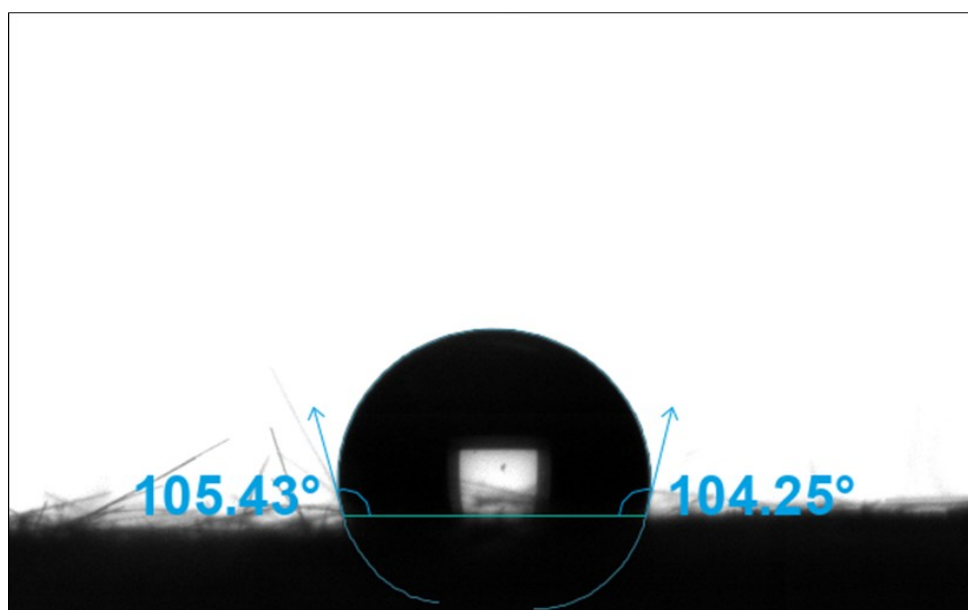

**Figure S4** Water contact angle of  $\text{SiO}_2$  aerogel

**Table S1** The elemental analysis of CMP-ED and CMP-PT

| Samples          | The ratio of content of H: | The ratio of content of Br: |
|------------------|----------------------------|-----------------------------|
|                  | C (mol: mol)               | C (mol: mol)                |
| CMP-ED           | 69.13:100                  | 1.73:100                    |
| CMP-PT           | 61.30:100                  | 6.49:100                    |
| CMP-ED after TGA | 11.07:100                  | 0                           |
| CMP-PT after TGA | 9.1:100                    | 0                           |

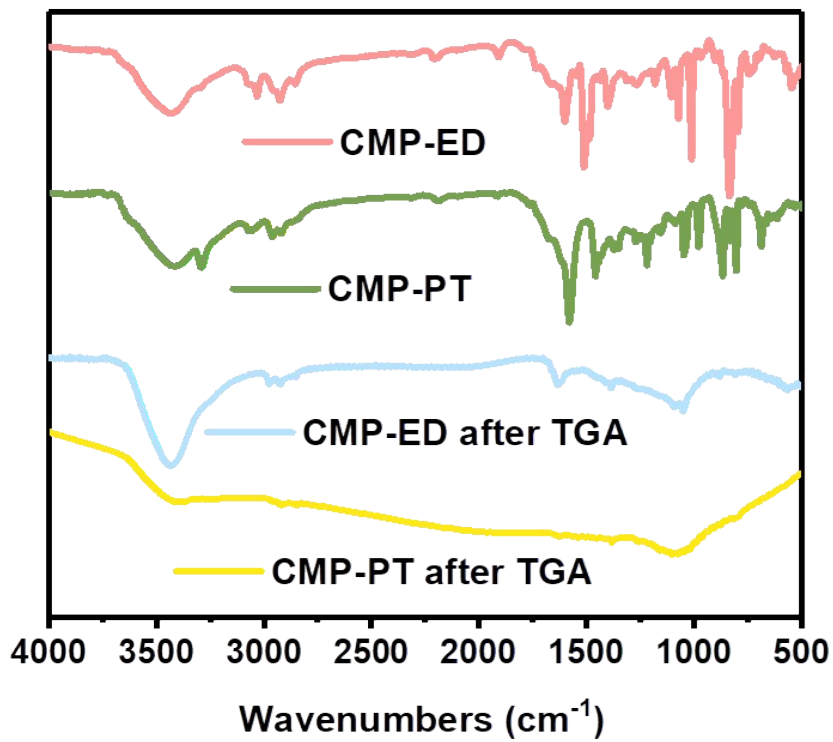

Figure S5 the FTIR spectra of CMP-PT and CMP-ED before and after TGA

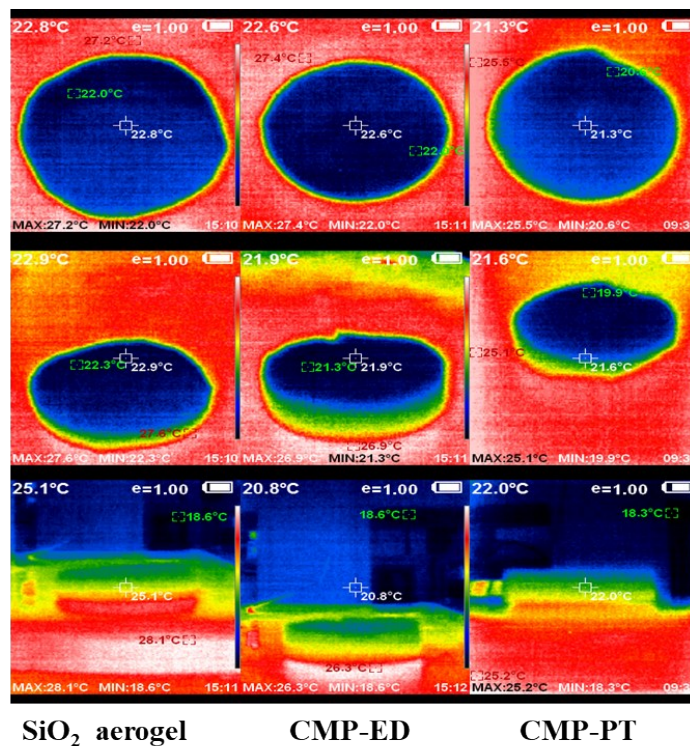

Figure S6 Thermographic images of SiO<sub>2</sub> aerogel, CMP-ED and CMP-PT at 298.15 K

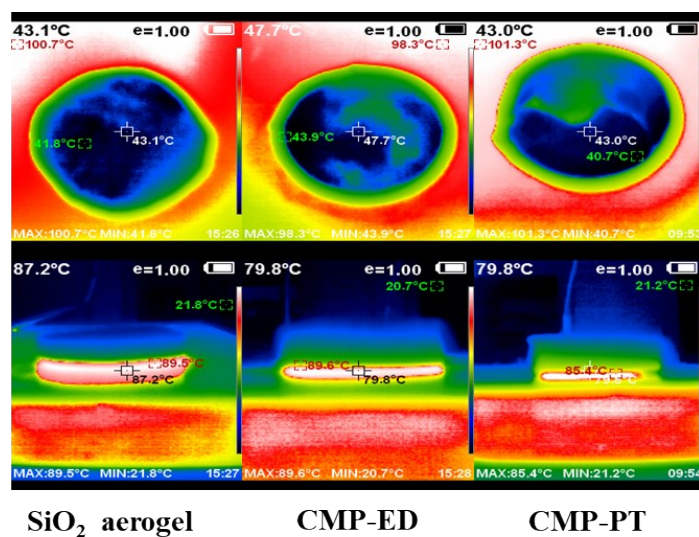

**Figure S7** Thermographic images of SiO<sub>2</sub> aerogel, CMP-ED and CMP-PT at 398.15 K

**Table S2** Thermal conductivity datas of CMP-ED, CMP-PT and commercial SiO<sub>2</sub> gel

| Test environmental humidity | Thermal conductivity (W m <sup>-1</sup> K <sup>-1</sup> ) |         |                                 |
|-----------------------------|-----------------------------------------------------------|---------|---------------------------------|
|                             | CMP-ED                                                    | CMP-PT  | commercial SiO <sub>2</sub> gel |
| 50%                         | 0.03404                                                   | 0.03565 | 0.03409                         |
| 70%                         | 0.03408                                                   | 0.03705 | 0.03655                         |
| Value changed (%)           | 0.12                                                      | 3.93    | 7.22                            |

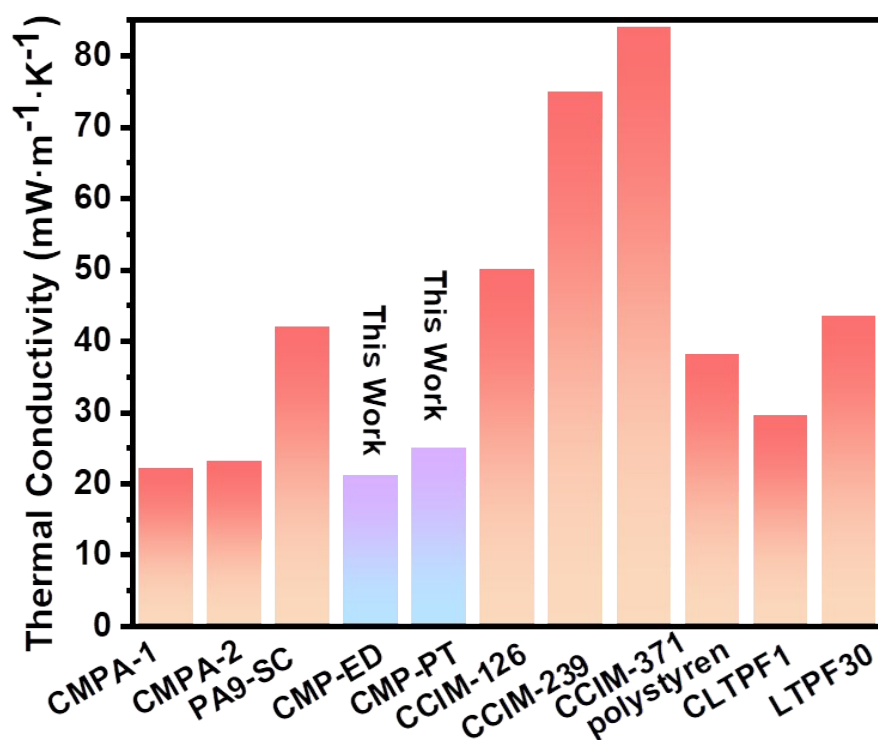

Figure S8 Comparison of thermal conductivity between CMP foams and other polymers <sup>1-3</sup>

## Reference

1. J. Li, A. Zhang, S. Zhang, Q. Gao, W. Zhang and J. Li, *Composites Part B: Engineering*, 2019, **156**, 368-377.
2. L. Wang, Y.-K. Wu, F.-F. Ai, J. Fan, Z.-P. Xia and Y. Liu, *Polymers*, 2018, **10**, 1310.
3. P. Mu, W. Bai, Z. Zhang, J. He, H. Sun, Z. Zhu, W. Liang and A. Li, *Journal of Materials Chemistry A*, 2018, **6**, 18183-18190.
